# Supplementary material for: The RNA-binding protein Staufen1 impairs myogenic differentiation via a c-myc–dependent mechanism
Source: PubMed Central journal article supplement — Mol Biol Cell. 2014 Nov 15;25(23):3765–78. doi: 10.1091/mbc.E14-04-0895 (PMC4230783; doi:10.1091/mbc.e14-04-0895), 2014-11-15
Supplement: supp_E14-04-0895v1_CombinedSupMats.pdf [file supp_E14-04-0895v1_CombinedSupMats.pdf]

# Supplemental Materials

*Molecular Biology of the Cell*

Ravel-Chapuis et al.

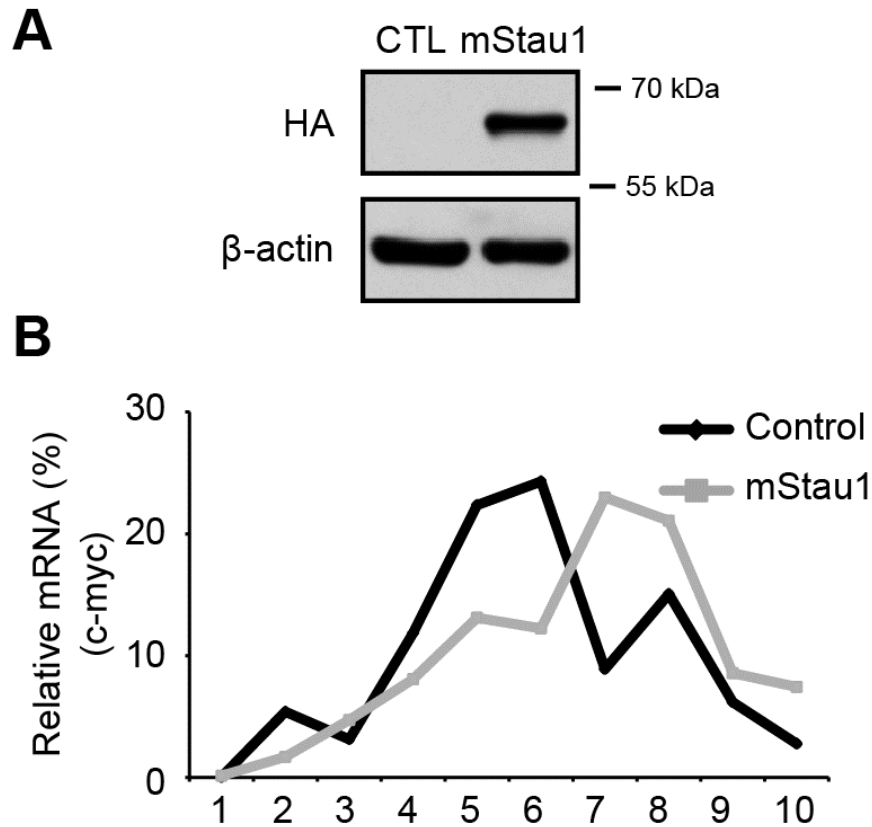

**Figure S1: Staufen1 overexpression shifts the distribution of c-myc mRNAs to the polysome fractions.** C2C12 cells were transiently transfected with pcDNA3 control or Staufen1-HA vectors. **(A)** Western blots showing expression of Staufen1-HA in transfected cells.  $\beta$ -actin was used as a loading control. **(B)** Polysome profiling as in Figure 8E of control and Staufen1-HA transfected proliferating C2C12 cells. Levels of c-myc mRNAs were measured by qRT-PCR from ten 1 ml sucrose gradient fractions.
